# Supplementary material for: A novel non-canonical Wnt signature for prostate cancer aggressiveness
Source: PubMed Central journal article supplement (PMC5354754; doi:10.18632/oncotarget.14161), 2016-12-24
Supplement: oncotarget-08-9572-s001.pdf [file oncotarget-08-9572-s001.pdf]

Figure S1

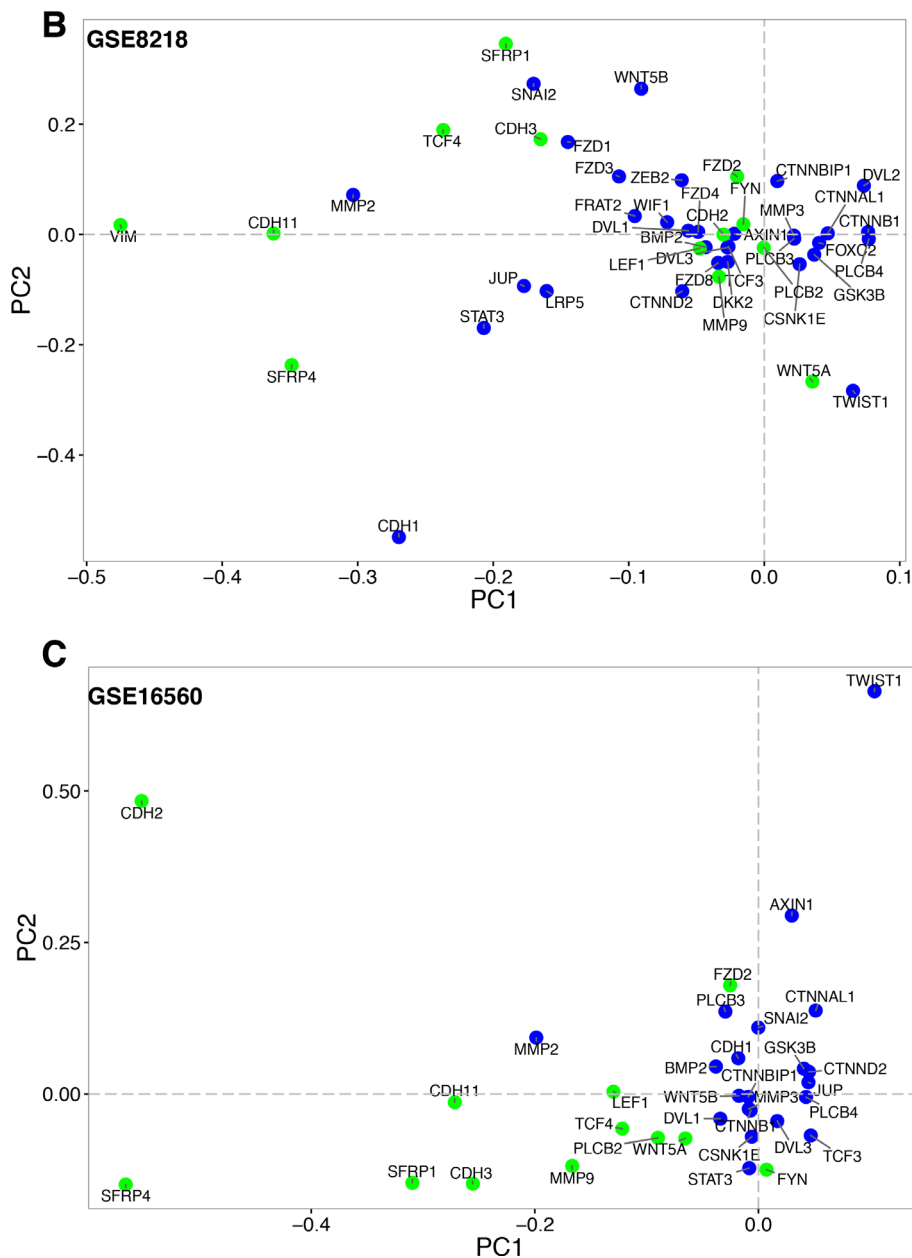

(Continued)

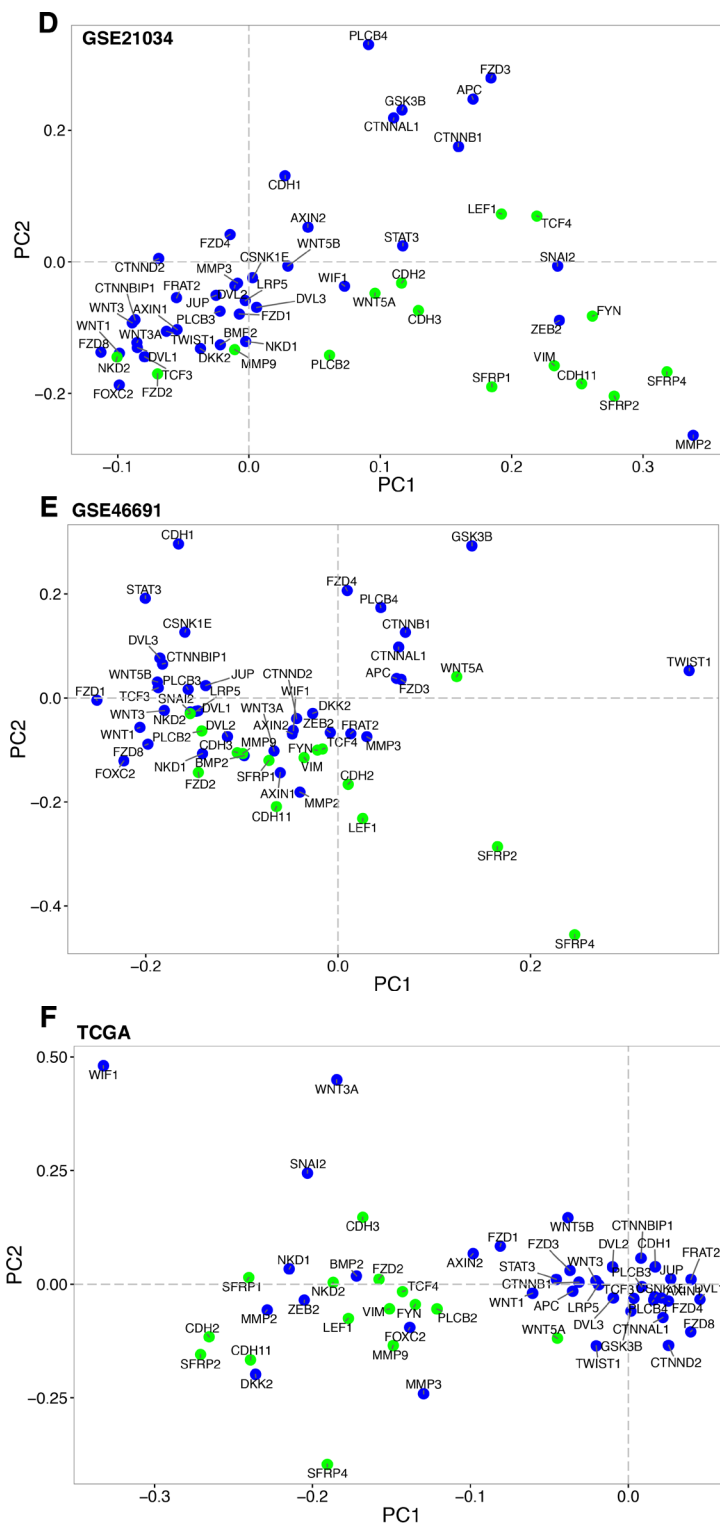

**Supplementary Figure 1: A-F.** PCA plots of the central WNT-EMT genes in the main cohort (A) and validation cohorts **D-E**. Genes in the NCWP-EMT signature is marked in green.

(Continued)

**G** GSE8218

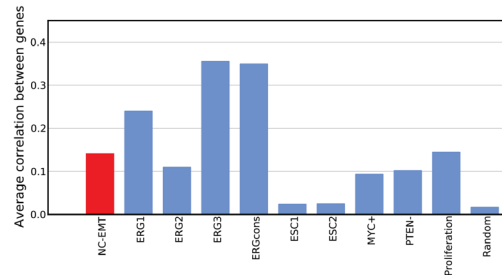

**H** GSE16560

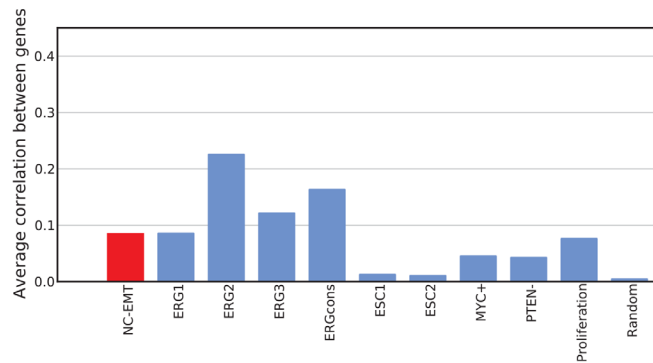

**I** GSE21034

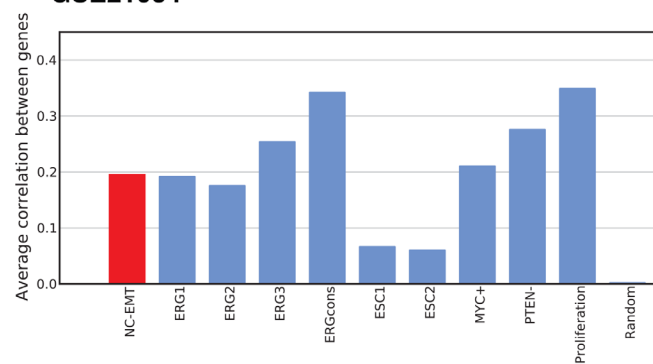

**J** GSE46691

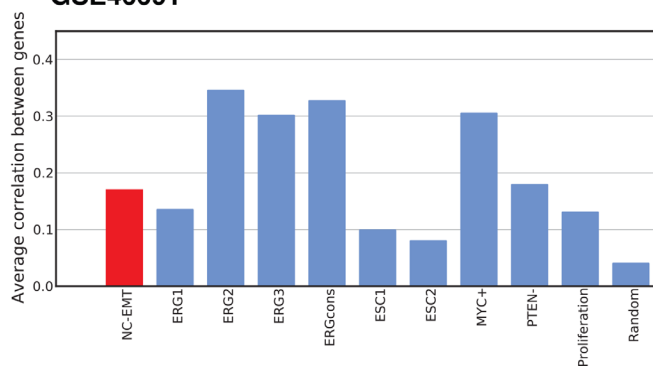

**Supplementary Figure 1 (Continued): G-J.** NCWP-EMT gene signature co-expression correlations (red), compared to other gene signatures (blue). (see Supplementary Table S1 for references on the validation cohorts.)

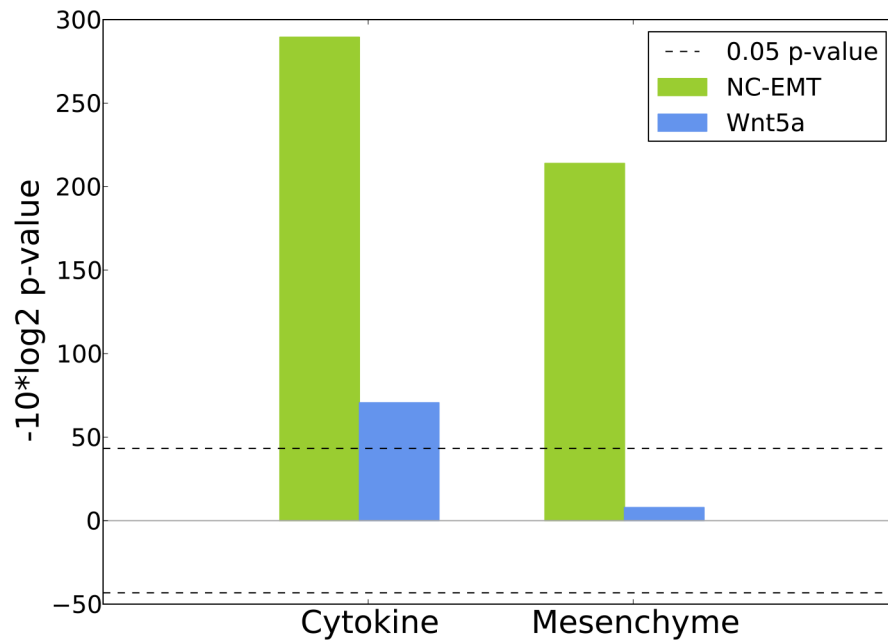

Supplementary Figure 2: P-values plot of NCWP-EMT (green) and Wnt5a (blue) coexpression with cytokine and mesenchyme gene expression signatures.

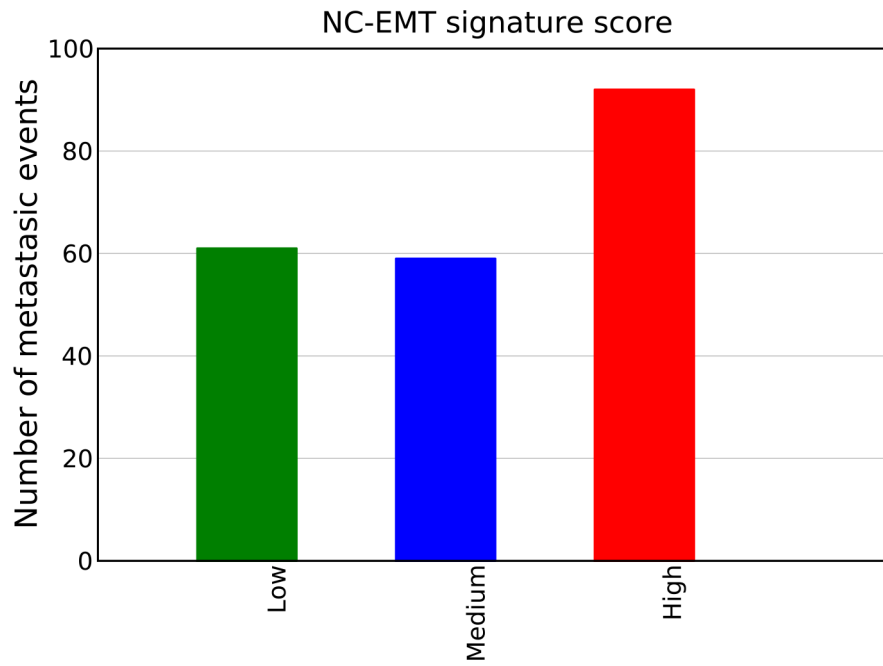

**Supplementary Figure 3: The number of metastatic events was significantly higher in high NCWP-EMT score patients (red) compared to low (green) and intermediate (blue) score patients, Chi-square test p-value 0.00029.**

Supplementary Table 1: Overview of the validation cohorts used in the study

| GEO accession | Total number of PCa samples | Low Gleason $\leq 7$ | High Gleason $\geq 8$ | Wnt-genes present in data (total=53) | NC-EMT genes present in data (total=15) | Type of follow up data (events) | Reference |
|---------------|-----------------------------|----------------------|-----------------------|--------------------------------------|-----------------------------------------|---------------------------------|-----------|
| GSE8218       | 65                          | 54                   | 11                    | 45                                   | 13                                      | survival                        | (1)       |
| GSE16560      | 281                         | 200                  | 81                    | 33                                   | 12                                      | survival                        | (2)       |
| GSE21034      | 131                         | 120                  | 11                    | 53                                   | 15                                      | recurrence (27)                 | (3)       |
| GSE46691      | 545                         | 334                  | 211                   | 53                                   | 15                                      | metastasis (212)                | (4)       |
| TCGA          | 497                         | 297                  | 200                   | 53                                   | 15                                      | No data                         | (5)       |

1. Wang Y, Xia XQ, Jia Z, Sawyers A, Yao H, Wang-Rodriquez J, et al. In silico estimates of tissue components in surgical samples based on expression profiling data. *Cancer Res.* 2010;70:6448-55.
2. Sboner A, Demichelis F, Calza S, Pawitan Y, Setlur SR, Hoshida Y, et al. Molecular sampling of prostate cancer: a dilemma for predicting disease progression. *BMC medical genomics.* 2010;3:8.
3. Taylor BS, Schultz N, Hieronymus H, Gopalan A, Xiao Y, Carver BS, et al. Integrative genomic profiling of human prostate cancer. *Cancer cell.* 2010;18:11-22.
4. Erho N, Crisan A, Vergara IA, Mitra AP, Ghadessi M, Buerki C, et al. Discovery and Validation of a Prostate Cancer Genomic Classifier that Predicts Early Metastasis Following Radical Prostatectomy. *PLoS One.* 2013;8.
5. The Cancer Genome Atlas (TCGA) [Available from: <http://cancergenome.nih.gov/>].

**Supplementary Table 2: Overview of all the selected genes used for analysis of the Wnt Pathway, and the p-values for alterations in expression between cancer and normal, and high and low Gleason samples.** In addition pathway classification and relevance in prostate cancer based on previous literature is noted, as well as our own classification of the genes in relation to prostate cancer.

See Supplementary File 1



**Supplementary Table 3: Most significant GO-terms for top 1000 differentially expressed genes between samples with high and low NCWP-EMT GSEA score, and between samples with high and low expression levels of Wnt5a**

| Source                                                                          | Term                                         | Benjamini corrected p-value |
|---------------------------------------------------------------------------------|----------------------------------------------|-----------------------------|
| <b>NC-EMT</b>                                                                   |                                              |                             |
| <b>Terms related to cell surface and extracellular functions (Mesenchymal):</b> |                                              |                             |
| SP_PIR_KEYWORDS                                                                 | signal                                       | 5.3e-27                     |
| UP_SEQ_FEATURE                                                                  | signal peptide                               | 5.7e-26                     |
| SP_PIR_KEYWORDS                                                                 | glycoprotein                                 | 3.3e-20                     |
| UP_SEQ_FEATURE                                                                  | glycosylation site: N-linked(GlcNAc?)        | 9.0e-16                     |
| GOTERM_CC_FAT                                                                   | extracellular region part                    | 6.4e-16                     |
| UP_SEQ_FEATURE                                                                  | topological domain: Extracellular            | 9.0e-12                     |
| GOTERM_CC_FAT                                                                   | proteinaceous extracellular matrix           | 7.2e-13                     |
| GOTERM_BP_FAT                                                                   | biological adhesion                          | 1.2e-11                     |
| GOTERM_BP_FAT                                                                   | cell adhesion                                | 1.5e-11                     |
| SP_PIR_KEYWORDS                                                                 | Secreted                                     | 8.9e-11                     |
| GOTERM_CC_FAT                                                                   | extracellular matrix                         | 1.2e-11                     |
| GOTERM_CC_FAT                                                                   | extracellular region                         | 3.4e-10                     |
| GOTERM_CC_FAT                                                                   | plasma membrane part                         | 1.4e-10                     |
| GOTERM_CC_FAT                                                                   | integral to plasma membrane                  | 3.4e-10                     |
| GOTERM_CC_FAT                                                                   | plasma membrane                              | 2.9e-10                     |
| GOTERM_CC_FAT                                                                   | intrinsic to plasma membrane                 | 4.2e-10                     |
| GOTERM_CC_FAT                                                                   | extracellular space                          | 2.2e-6                      |
| <b>Terms related immune response and inflammation (Cytokine):</b>               |                                              |                             |
| GOTERM_BP_FAT                                                                   | positive regulation of immune system process | 7.0e-15                     |
| GOTERM_BP_FAT                                                                   | positive regulation of immune response       | 4.9e-11                     |
| GOTERM_BP_FAT                                                                   | response to wounding                         | 7.5e-9                      |
| GOTERM_BP_FAT                                                                   | inflammatory response                        | 8.1e-9                      |
| GOTERM_BP_FAT                                                                   | defense response                             | 9.3e-9                      |
| GOTERM_BP_FAT                                                                   | positive regulation of cell activation       | 1.4e-9                      |
| GOTERM_BP_FAT                                                                   | regulation of lymphocyte activation          | 7.8e-9                      |
| GOTERM_BP_FAT                                                                   | regulation of T cell activation              | 1.5e-8                      |
| GOTERM_BP_FAT                                                                   | regulation of leukocyte activation           | 2.3e-8                      |
| GOTERM_BP_FAT                                                                   | positive regulation of response to stimulus  | 2.0e-7                      |
| GOTERM_BP_FAT                                                                   | activation of immune response                | 1.3e-5                      |
| GOTERM_BP_FAT                                                                   | immune effector process                      | 5.2e-5                      |
| <b>WNT5A</b>                                                                    |                                              |                             |
| SP_PIR_KEYWORDS                                                                 | SH2 domain                                   | 1.2e-2                      |
| GOTERM_MF_FAT                                                                   | kinase binding                               | 8.6e-2                      |
| SP_PIR_KEYWORDS                                                                 | membrane                                     | 2.0e-2                      |
| SP_PIR_KEYWORDS                                                                 | transmembrane                                | 6.2e-2                      |
| BIOCARTA                                                                        | T Helper Cell Surface Molecules              | 5.8e-2                      |
| SP_PIR_KEYWORDS                                                                 | Ehler Danlos syndome                         | 5.6e-2                      |

**Supplementary Table 4: Metabolite concentration and alterations between low, intermediate and high NC-EMT signature score, for the main cohort**

| Signature score | Metabolite concentration (mmol/kg wet weight) |                        |                        | P-values <sup>a</sup> |          |           |
|-----------------|-----------------------------------------------|------------------------|------------------------|-----------------------|----------|-----------|
|                 | Low                                           | Int                    | High                   | High/Low              | High/Int | Int/Low   |
| Metabolite      | Median (IQR)<br>(n=32)                        | Median (IQR)<br>(n=31) | Median (IQR)<br>(n=32) |                       |          |           |
| Alanine         | 2.23 (1.68-2.82)                              | 2.46 (1.87-3.20)       | 2.08 (1.65-2.60)       | 0.407                 | 0.228    | 0.792     |
| Choline         | 1.07 (0.68-1.42)                              | 1.03 (0.69-1.92)       | 1.06 (0.66-1.65)       | 0.806                 | 0.511    | 0.792     |
| Citrate         | 7.31 (5.57-11.56)                             | 6.38 (4.56-11.58)      | 3.55 (2.08-7.25)       | 3.38E-04*             | 0.018*   | 0.282     |
| Creatine        | 1.93 (1.39-2.71)                              | 2.32 (2.01-2.67)       | 1.98 (1.61-2.50)       | 0.684                 | 0.259    | 0.592     |
| Ethanolamine    | 0.00 (0.00-0.29)                              | 0.00 (0.00-0.17)       | 0.00 (0.00-0.19)       | 0.881                 | 0.884    | 0.938     |
| Glucose         | 0.09 (0.00-0.52)                              | 0.00 (0.00-0.36)       | 0.00 (0.00-0.25)       | 0.449                 | 0.884    | 0.658     |
| Glutamate       | 4.68 (3.20-6.67)                              | 5.77 (3.85-7.52)       | 5.24 (4.21-7.51)       | 0.974                 | 0.905    | 0.993     |
| Glutamine       | 2.75 (2.10-3.55)                              | 2.76 (2.27-3.86)       | 2.80 (2.53-3.49)       | 0.974                 | 0.884    | 0.938     |
| GPC             | 0.98 (0.53-1.36)                              | 0.44 (0.73-1.16)       | 0.74 (0.50-1.06)       | 0.407                 | 0.578    | 0.754     |
| GPEA            | 0.00 (0.00-0.68)                              | 0.09 (0.00-0.53)       | 0.10 (0.00-0.58)       | 0.958                 | 0.884    | 0.938     |
| Glycine         | 2.38 (1.57-3.04)                              | 2.48 (1.89-3.43)       | 2.55 (1.91-3.63)       | 0.881                 | 0.884    | 0.754     |
| Isoleucine      | 0.12 (0.00-0.20)                              | 0.17 (0.12-0.29)       | 0.19 (0.10-0.32)       | 0.163                 | 0.884    | 0.132     |
| Lactate         | 16.74 (13.66-22.57)                           | 21.86 (15.62-26.41)    | 20.31 (16.47-25.26)    | 0.974                 | 0.511    | 0.425     |
| Leucine         | 0.42 (0.21-0.58)                              | 0.49 (0.36-0.65)       | 0.57 (0.33-0.93)       | 0.684                 | 0.884    | 0.792     |
| Myo-inositol    | 8.17 (6.46-10.21)                             | 9.83 (7.43-12.87)      | 9.55 (8.36-11.65)      | 0.834                 | 0.497    | 0.131     |
| Phosphocholine  | 0.55 (0.28-1.04)                              | 0.87 (0.54-1.17)       | 0.74 (0.48-1.32)       | 0.806                 | 0.689    | 0.282     |
| PEA             | 2.18 (1.25-2.89)                              | 2.92 (2.23-4.00)       | 2.88 (2.20-3.79)       | 0.159                 | 0.511    | 2.14E-03* |
| Putrescine      | 0.04 (0.00-0.35)                              | 0.08 (0.00-0.20)       | 0.00 (0.00-0.53)       | 0.601                 | 0.884    | 0.754     |
| Scyllo-inositol | 0.41 (0.32-0.59)                              | 0.44 (0.32-0.64)       | 0.45 (0.38-0.62)       | 0.589                 | 0.327    | 0.792     |
| Spermine        | 1.55 (1.02-2.36)                              | 1.23 (0.67-2.27)       | 0.75 (0.39-1.43)       | 3.38E-04*             | 0.028*   | 0.113     |
| Succinate       | 0.64 (0.42-0.88)                              | 0.61 (0.49-0.94)       | 0.60 (0.45-0.71)       | 0.589                 | 0.511    | 0.965     |
| Taurine         | 3.84 (2.84-4.94)                              | 4.05 (4.62-6.96)       | 5.76 (4.03-7.28)       | 0.131                 | 0.884    | 0.022*    |
| Valine          | 0.32 (0.20-0.46)                              | 0.38 (0.24-0.56)       | 0.41 (0.28-0.59)       | 0.806                 | 0.689    | 0.938     |

*ex vivo*.

<sup>a</sup> P-values from Linear mixed model adjusted or multiple samples per patient, corrected for multiple testing by the Benjamini and Hochberg procedure.

\* Indicates significant p-values

Abbreviations: Int - Intermediate, IQR - Interquartile range, GPC - Glycerophosphocholine, GPEA - Glycerophosphoethanolamine, PEA - Phosphoethanolamine.

**Supplementary Table 5: P-values for metabolite alteration between low and high NC-EMT samples, adjusting for Gleason risk and tissue heterogeneity**

| Adjusted for:   | P-values <sup>a</sup> |                       |                 |                 |                            |                        |
|-----------------|-----------------------|-----------------------|-----------------|-----------------|----------------------------|------------------------|
|                 | Patient               | Patient, Gleason risk | Patient, Stroma | Patient, Cancer | Patient, Benign epithelium | Patient, Luminal space |
| Alanine         | 0.407                 | 0.352                 | 0.623           | 0.509           | 0.329                      | 0.480                  |
| Choline         | 0.806                 | 0.839                 | 0.847           | 0.837           | 0.818                      | 0.735                  |
| Citrate         | 3.38E-04*             | 2.42E-03*             | 4.20E-04*       | 2.01E-04*       | 8.61E-04*                  | 2.81E-03 *             |
| Creatine        | 0.684                 | 0.855                 | 0.650           | 0.671           | 0.805                      | 0.735                  |
| Ethanolamine    | 0.881                 | 0.958                 | 0.950           | 0.837           | 0.867                      | 0.839                  |
| Glucose         | 0.449                 | 0.657                 | 0.109           | 0.176           | 0.515                      | 0.417                  |
| Glutamate       | 0.974                 | 0.839                 | 0.650           | 0.916           | 0.856                      | 0.965                  |
| Glutamine       | 0.974                 | 0.839                 | 0.650           | 0.837           | 0.867                      | 0.903                  |
| GPC             | 0.407                 | 0.303                 | 0.623           | 0.509           | 0.249                      | 0.578                  |
| GPEA            | 0.958                 | 0.958                 | 0.734           | 0.837           | 0.933                      | 0.965                  |
| Glycine         | 0.881                 | 0.955                 | 0.623           | 0.671           | 0.981                      | 0.965                  |
| Isoleucine      | 0.163                 | 0.143                 | 0.119           | 0.176           | 0.109                      | 0.239                  |
| Lactate         | 0.974                 | 0.958                 | 0.650           | 0.837           | 0.933                      | 0.965                  |
| Leucine         | 0.684                 | 0.958                 | 0.542           | 0.587           | 0.818                      | 0.735                  |
| Myo-inositol    | 0.834                 | 0.839                 | 0.650           | 0.787           | 0.832                      | 0.735                  |
| Phosphocholine  | 0.806                 | 0.958                 | 0.623           | 0.587           | 0.867                      | 0.735                  |
| PEA             | 0.159                 | 0.143                 | 0.109           | 0.127           | 0.221                      | 0.246                  |
| Putrescine      | 0.601                 | 0.397                 | 0.623           | 0.587           | 0.805                      | 0.691                  |
| Scyllo-inositol | 0.589                 | 0.566                 | 0.650           | 0.587           | 0.515                      | 0.735                  |
| Spermine        | 3.38E-04*             | 1.62E-03*             | 4.20E-04*       | 2.01E-04*       | 8.61E-04*                  | 2.81E-03*              |
| Succinate       | 0.589                 | 0.414                 | 0.767           | 0.658           | 0.515                      | 0.691                  |
| Taurine         | 0.131                 | 0.143                 | 0.119           | 0.127           | 0.092                      | 0.161                  |
| Valine          | 0.806                 | 0.958                 | 0.623           | 0.671           | 0.828                      | 0.843                  |

<sup>a</sup> P-values from Linear mixed model, corrected for multiple testing by the Benjamini and Hochberg procedure.

\* Indicates significant p-values

Abbreviations: GPC - Glycerophosphocholine, GPEA - Glycerophosphoethanolamine, PEA - Phosphoethanolamine.

**Supplementary Table 6: There were no metabolic differences between low, intermediate and high WNT5A gene expression in the main cohort or between low/moderate and high Wnt5a IHC expression in the validation cohort**

| WNT5A expression/<br>Metabolite | Main cohort P-values <sup>a</sup> |          |          | Validation cohort<br>P-values <sup>b</sup> |
|---------------------------------|-----------------------------------|----------|----------|--------------------------------------------|
|                                 | Low/Int                           | Low/High | Int/High | IHC: Low/High                              |
| Alanine                         | 0.502                             | 0.710    | 0.990    | 0.670                                      |
| Choline                         | 0.836                             | 0.826    | 0.990    | 0.926                                      |
| Citrate                         | 0.715                             | 0.826    | 0.892    | 0.623                                      |
| Creatine                        | 0.882                             | 0.826    | 0.892    | 0.406                                      |
| Ethanolamine                    | 0.987                             | 0.240    | 0.190    | 0.175                                      |
| Glucose                         | 0.836                             | 0.882    | 0.990    | 0.396                                      |
| Glutamate                       | 0.836                             | 0.882    | 0.892    | 0.755                                      |
| Glutamine                       | 0.836                             | 0.882    | 0.990    | 0.672                                      |
| GPC                             | 0.715                             | 0.882    | 0.990    | 0.433                                      |
| GPEA                            | 0.744                             | 0.826    | 0.990    | 0.666                                      |
| Glycine                         | 0.638                             | 0.882    | 0.892    | 0.746                                      |
| Isoleucine                      | 0.855                             | 0.882    | 0.892    | 0.367                                      |
| Lactate                         | 0.684                             | 0.882    | 0.892    | 0.682                                      |
| Leucine                         | 0.744                             | 0.826    | 0.892    | 0.117                                      |
| Myo-inositol                    | 0.684                             | 0.826    | 0.990    | 0.603                                      |
| Phosphocholine                  | 0.638                             | 0.882    | 0.892    | 0.628                                      |
| PEA                             | 0.568                             | 0.826    | 0.892    | 0.610                                      |
| Putrescine                      | 0.502                             | 0.710    | 0.990    | 0.423                                      |
| Scyllo-inositol                 | 0.684                             | 0.826    | 0.990    | 0.765                                      |
| Spermine                        | 0.836                             | 0.918    | 0.990    | 0.619                                      |
| Succinate                       | 0.638                             | 0.826    | 0.990    | 0.498                                      |
| Taurine                         | 0.502                             | 0.826    | 0.892    | 0.430                                      |
| Valine                          | 0.684                             | 0.826    | 0.990    | 0.313                                      |

<sup>a</sup> P-values from Linear mixed model adjusted or multiple samples per patient, corrected for multiple testing by the Benjamini and Hochberg procedure.

<sup>b</sup> P-values from independent samples t-test. Not corrected for multiple testing

Abbreviations: Int - Intermediate, GPC - Glycerophosphocholine,  
GPEA - Glycerophosphoethanolamine, PEA - Phosphoethanolamine.

**Supplementary Table 7: Immunohistochemistry scoring for staining index (SI)**

| Score                        | 0                      | 1             | 2                 | 3               |
|------------------------------|------------------------|---------------|-------------------|-----------------|
| Staining intensity           | No detectable staining | Weak staining | Moderate staining | Strong staining |
| Percentage of positive cells | 0%                     | 1-10%         | 11-50%            | >50%            |
| Staining index (SI)          | 0                      | 1,2           | 3,4,6             | 9               |
| Staining classification      | Negative               | Weak          | Moderate          | Strong          |

Staining index (SI) is obtained by multiplying the scores of staining intensity and percentage of positive cells.

Supplementary Table 8: Multivariate cox proportional hazards analyses of biochemical recurrence

| Variables                                                          | NCWP-EMT model<br>(AIC = 65.61) |         | Post-operative Gleason score model<br>(AIC = 64.24) |         |
|--------------------------------------------------------------------|---------------------------------|---------|-----------------------------------------------------|---------|
|                                                                    | Hazard ratio<br>(95% CI)        | P-value | Hazard ratio<br>(95% CI)                            | P-value |
| <b>Post-operative Gleason score</b><br>( $\leq 7^*$ and $\geq 8$ ) | -                               | -       | 5.42<br>(0.86-34.11)                                | 0.072   |
| <b>Pathological T-stage</b><br>( $\leq T2c^*$ and $\geq T3a$ )     | 3.79<br>(0.91-1.63)             | 0.088   | 2.12<br>(0.35-12.77)                                | 0.41    |
| <b>Preoperative PSA</b><br>$\leq 10^*$ and $\geq 10$               | 2.14<br>(9.82-17.5)             | 0.22    | 2.47<br>(0.69-8.85)                                 | 0.17    |
| <b>NCWP-EMT</b><br>Continuous score/100<br>(-4.4-5.4)              | 1.22<br>(0.91-1.63)             | 0.188   | -                                                   | -       |

\* Indicates the group used as a reference in each analysis.
